# Supplementary material for: Genome-Wide Identification of WRKY Transcription Factors in the Asteranae
Source: MDPI journal article supplement (doi:10.3390/plants8100393), 2019-10-01
Supplement: s1 [file s1]

## Group II a

|            |                    | *         | 20    | *          | 40       | *              |    |
|------------|--------------------|-----------|-------|------------|----------|----------------|----|
| Cc WRKY16  | DGYQWRKYGQKVTRDNPS | SPRAYFKCS | HAPSC | CPVKKKVQSV | VEDQS    | SILVATYEGEHNHP | 58 |
| Cc WRKY50  | DGYQWRKYGQKVTRDNPS | SPRAYYKCS | FAPSC | CHAKKKVQSV | VDDAG    | VLVATYEGEHNH   | 57 |
| Cc WRKY53  | DGYQWRKYGQKVTRDNPS | SPRAYYKCS | FAPSC | CPVKKKVQSV | VEDAHLLV | VVYEGEHNHQ     | 58 |
| Cc WRKY54  | DGYQWRKYGQKVTRDNPS | SPRAYYKCS | FAPSC | TVKKKVQKSV | VDDAHLLV | VVYEGVHNHE     | 58 |
| Cc WRKY55  | DGYQWRKYGQKVTRDNPS | SPRAYYKCS | FAPSC | CPVKKKVQSV | VNDHLLV  | VVYEGEHNHE     | 58 |
| Ha WRKY5   | DGYQWRKYGQKVTRDNPS | SPRAYYKCS | FAPTC | CPVKKKVQSM | DDNGVVM  | VVYEGEHNH      | 57 |
| Ha WRKY10  | DGYHWRKYGQKVTRDNPS | SPRAYYKCS | FAPTC | CPVKKKVQSV | VDDAGLLV | VVYEGEHNH      | 57 |
| Ha WRKY56  | DGYQWRKYGQKVTRDNPS | SPRAYFKCS | HAPTC | CPVKKKVQSV | VEDQS    | SILVATYEGEHNHP | 58 |
| Ha WRKY99  | DGYQWRKYGQKVTRDNPS | SPRAYFKCS | HAPSC | CPVKKKVQSD | VADQS    | SILVATYEGEHNHP | 58 |
| Ha WRKY108 | DGYQWRKYGQKVTRNNPS | SPRAYYKCS | YAPLC | CPVKKKVQSM | DDDGLL   | VVATYEGEHNH    | 57 |
| Ls WRKY11  | DGYQWRKYGQKVTRDNPS | SPRAYYKCS | SSPTC | CPVKKKVQSV | DDPGVVAT | YEGEHNH        | 57 |
| Ls WRKY22  | DGYQWRKYGQKVTRDNPS | SPRAYFKCS | HAPTC | CPVKKKVQSV | VEDQS    | SILVATYEGEHNHP | 58 |
| Ls WRKY28  | DGYQWRKYGQKVTRDNPC | SPRAYYKCS | FAPSC | CPVKKKVQSV | DDDEGLLV | VVYEGEHNHE     | 58 |
| Dc WRKY34  | DGYQWRKYGQKVTRDNPS | SPRAYFKCS | YAPTC | CPVKKKVQSV | IDDS     | SILVATYEGEHNHP | 58 |
| Dc WRKY45  | DGYQWRKYGQKVTRDNPS | SPRAYYKCS | FAPNC | CPVKKKVQSV | VEDAS    | IIVATYEGEHNH   | 57 |
| Dc WRKY56  | DGYQWRKYGQKVTRDNPC | SPRAYFKCS | FAPTC | CPVKKKVQSV | VEDQS    | SILVATYEGEHNHP | 58 |
| Pg WRKY22  | DGYQWRKYGQKVTRDNPS | SPRAYFKCS | FAPTC | CPVKKKVQSV | IEDQS    | SILVATYEGEHNHP | 58 |
| Pg WRKY31  | DGYHWRKYGQKVTRDNPS | SPRAYYKCS | FAPNC | CPVKKKVQSV | VEDCTMV  | VATYEGEHNH     | 57 |
| Pg WRKY35  | DGYHWRKYGQKVTRDNPS | SPRAYYKCS | FAPNC | CPVKKKVQSV | VEDCTMV  | VATYEGEHNH     | 57 |
| Pg WRKY38  | DGYQWRKYGQKVTRDNPS | SPRAYFKCS | FAPTC | CPVKKKVQSV | IEDQS    | SILVATYEGEHNHP | 58 |
| Pg WRKY77  | DGYQWRKYGQKVTRDNPS | SPRAYFKCS | FAPTC | CPVKKKVQSV | IEDQS    | SILVATYEGEHNHP | 58 |
| Pn WRKY14  | DGYQWRKYGQKVTRDNPS | SPRAYFKCS | FAPTC | CPVKKKVQSV | IEDQS    | SILVATYEGEHNHP | 58 |
| Pn WRKY21  | DGYQWRKYGQKVTRDNPS | SPRAYFKCS | FAPTC | CPVKKKVQSV | IEDQS    | SILVATYEGEHNHP | 58 |

## Group II b

|            | *                   | 20         | *          | 40        | *         | 60                 |    |
|------------|---------------------|------------|------------|-----------|-----------|--------------------|----|
| Cc WRKY4   | -DGCQWRKYGQKMAKGNPC | PRAYYRCTMA | -VGC       | PVRKQVQRC | AEDQ      | TILITTYEGTHNHP     | 58 |
| Cc WRKY10  | -DGCQWRKYGQKLAAGNPC | PRAYYRCTMA | -VGC       | PVRKQVQRC | AEDQ      | TILITTYEGTHNHP     | 58 |
| Cc WRKY21  | NDGCQWRKYGQKIAKGNPC | PRAYYRCTIS | -PTC       | PVRKQVQRC | PODMS     | SILITTYEGTHNHP     | 59 |
| Cc WRKY27  | -DGCQWRKYGQKIAKGNPC | PRAYYRCTMS | -VGC       | PVRKQVQRC | AEDQ      | TILITTYEGTHNHP     | 58 |
| Cc WRKY48  | NDGCQWRKYGQKIAKGNPC | PRAYYRCTMS | -PSC       | PVRKHVQRC | AEDRS     | VLITTYEGTHNHP      | 59 |
| Cc WRKY59  | -DGCQWRKYGQKMAKGS   | PRAYYRCTMA | -VGC       | PVRKQVQRC | AEDK      | TILITTYEGTHNHP     | 58 |
| Ha WRKY14  | -DGCQWRKYGQKMAKGNPC | PRAYYRCTMA | -VGC       | PVRKQVQRC | VDDQ      | TILITTYEGTHHP      | 58 |
| Ha WRKY22  | -DGCQWRKYGQKMAKGNPC | PRAYYRCTMA | -TGC       | PVRKQVQRC | AEDRT     | ILITTYEGTHNHP      | 58 |
| Ha WRKY24  | -DGCQWRKYGQKMAKGNPC | PRAYYRCTMA | -VGC       | PVRKQVQRC | LABDQ     | TILITTYEGTHSHP     | 58 |
| Ha WRKY26  | NDGCQWRKYGQKIAKGNPC | PRAYYRCTVS | -PTC       | PVRKQVQRC | PODMS     | SILITTYEGTHNHP     | 59 |
| Ha WRKY65  | NDGCQWRKYGQKIAKGNPC | PRAYYRCTVS | -TNC       | PVRKQVQRC | PODMS     | SILITTYEGTHNHP     | 59 |
| Ha WRKY66  | NDGCQWRKYGQKIAKGNPC | PRAYYRCTVA | -PGC       | PVRKQVQRC | LEDMS     | SILITTYEGTHNHP     | 59 |
| Ha WRKY71  | -DGCQWRKYGQKMAKGNPC | PRAYYRCTMA | -VGC       | PVRKQVQRC | AEDK      | TILITTYEGTHNHP     | 58 |
| Ha WRKY77  | -DGCQWRKYGQKMAKGNPC | PRAYYRCTMA | -VGC       | PVRKQVQRC | AEDRT     | VLITTYEGTHNHP      | 58 |
| Ha WRKY81  | -DGCQWRKYGQKI       | SKGNPC     | PRAYYRCTMA | -VGC      | PVRKQVQRC | IQDKTILITTYEGTHNHP | 58 |
| Ha WRKY101 | -DGCQWRKYGQKMAKGNPC | PRAYYRCTMA | -TGC       | PVRKQVQRC | AEDRT     | ILITTYEGTHNHP      | 58 |
| Ha WRKY104 | NDGCQWRKYGQKIAKGNPC | PRAYYRCTVS | -AGC       | PVRKQVQRC | LEDMS     | SILITTYEGTHNHP     | 59 |
| Ha WRKY109 | NDGCQWRKYGQKIAKGNPC | PRAYYRCTLS | -PSC       | PVRKHVQRC | AENRS     | VLITTYEGTHNHP      | 59 |
| Ls WRKY13  | NDGCQWRKYGQKIAKGNPC | PRAYYRCTVS | -SSC       | PVRKHVQRC | AEDRS     | VLITTYEGTHNHP      | 59 |
| Ls WRKY21  | -DGCQWRKYGQKMAKGNPC | PRAYYRCTMA | -VGC       | PVRKQVQRC | VDDQ      | TILITTYEGTHNHP     | 58 |
| Ls WRKY27  | NDGCQWRKYGQKIAKGNPC | PRAYYRCTVS | -PTC       | PVRKQVQRC | PODMS     | SILITTYEGTHNHP     | 59 |
| Ls WRKY30  | NDGCQWRKYGQKIAKGNPC | PRAYYRCTVA | -PGC       | PVRKQVQRC | LEDMS     | SILITTYEGTHNHP     | 59 |
| Ls WRKY32  | -DGCQWRKYGQKIAKGNPC | PRAYYRCTMA | -AGC       | LVRKQVQRC | AEDRS     | SILITTYEGTHNHP     | 58 |
| Ls WRKY38  | -DGCQWRKYGQKMAKGNPC | PRAYYRCTMA | -VGC       | PVRKQVQRC | WADDQ     | TILITTYEGTHNHP     | 58 |
| Ls WRKY46  | -DGCQWRKYGQKMAKGNPC | PRAYYRCTMA | -AGC       | PVRKQVQRC | AEDRT     | ILITTYEGTHNHP      | 58 |
| Ls WRKY47  | -DGCQWRKYGQKMAKGNPC | PRAYYRCTMV | -VGC       | PVRKQVQRC | SMDDQ     | TILITTYEGTHNHP     | 58 |
| Ls WRKY74  | -DGCQWRKYGQKMAKGNPC | PRAYYRCTMA | -VGC       | PVRKQVQRC | AEDRT     | ILITTYEGTHNHP      | 58 |
| Dc WRKY4   | -DGCQWRKYGQKMAKGNPC | PRAYYRCTMA | -VGC       | PVRKQVQRC | AEDRT     | ILITTYEGTHNHP      | 58 |
| Dc WRKY15  | NDGCQWRKYGQKIAKGNPC | PRAYYRCTMS | -PSC       | PV---     | QRCHEN    | MSVLITTYEGTHNHP    | 55 |
| Dc WRKY18  | -DGCQWRKYGQKMAKGNPC | PRAYYRCTMA | -GGC       | PVRKQVQRC | AEDRT     | ILITTYEGAHNHP      | 58 |
| Dc WRKY35  | NDGCQWRKYGQKIAKGNPC | PRAYYRCTVA | -PSC       | PVRKQVQRC | SODMS     | SILISTYEGTHSHP     | 59 |
| Dc WRKY41  | -DGCQWRKYGQKMAKGNPC | PRAYYRCTMA | -AGC       | PVRKQVQRC | AEDRT     | ILITTYEGTHNHP      | 58 |
| Dc WRKY44  | -DGCQWRKYGQKIAKGNPC | PRAYYRCTMA | -TGC       | PVRKQVQRC | ADRS      | SILITTYEGTHNHP     | 58 |
| Dc WRKY46  | NDGCQWRKYGQKIAKGNPC | PRAYYRCTVA | -PGC       | PVRKQVQRC | LEDMS     | SILITTYEGTHNHP     | 59 |
| Dc WRKY49  | -DGCQWRKYGQKIAKGNPC | PRAYYRCTMA | -AGC       | PVRKQVQRC | AEDRS     | SILITTYEGTHNHP     | 58 |
| Dc WRKY57  | -DGCQWRKYGQKIAKGNPC | PRAYYRCSVT | -PSC       | PVRKQVQRC | SODMS     | SILITTYEGTHNH      | 57 |
| Dc WRKY65  | NDGCQWRKYGQKIAKGNPC | PRAYYRCTMS | -TSC       | PVRKHVQRC | QEDLS     | SILITTYEGSHNH      | 58 |
| Pg WRKY3   | -DGCQWRKYGQKIAKGNPC | PRAYYRCTMA | -AGC       | PVRKQVQRC | AEDRT     | ILITTYEGTHNHP      | 58 |
| Pg WRKY11  | -DGCQWRKYGQKMAKGNPC | PRAYYRCTMA | -AGC       | PVRKQVQRC | AEDRT     | ILITTYEGTHNHP      | 58 |
| Pg WRKY32  | NDGCQWRKYGQKIAKGNPC | PRAYYRCSVA | -SSC       | PVRKQVQRC | SDDMS     | SILITTYEGTHNH      | 58 |
| Pg WRKY51  | -DGCQWRKYGQKMAKGNPC | PRAYYRCTMA | -AGC       | PVRKQVQRC | AEDRT     | ILITTYEGTHNHP      | 58 |
| Pg WRKY56  | NDGCQWRKYGQKIAKGNPC | PRAYYRCTVA | -PTC       | PVRKQVQRC | SDDMS     | SILITTYEGTHNHP     | 59 |
| Pg WRKY75  | NDGCQWRKYGQKI       | SKGNPC     | PRAYYRCTVS | -PSC      | PVRKHVQRC | AEDMSILITTYEGAHNH  | 58 |
| Pg WRKY83  | -DGCQWRKYGQKMAKGNPC | PRAYYRCTMA | -VGC       | PVRKQVQRC | AEDRT     | ILITTYEGTHNHP      | 58 |
| Pg WRKY90  | NDGCQWRKYGQKIAKGNPC | PRAYYRCTVA | -PAC       | PVRKQVQRC | AEDMS     | SILITTYEGTHNHP     | 59 |
| Pg WRKY95  | NDGCQWRKYGQKIAKGNPC | PRAYYRCTVA | -PAC       | PVRKQVQRC | AEDMS     | SILITTYEGTHNHP     | 59 |
| Pg WRKY97  | -DGCQWRKYGQKIAKGNPC | PRAYYRCTMA | -AGC       | PVRKQVQRC | AEDRT     | ILITTYEGTHNHP      | 58 |
| Pg WRKY101 | NDGCQWRKYGQKIAKGNPC | PRAYYRCTVA | -PTC       | PVRKQVQRC | SDDMS     | SILISTYEGTHNHP     | 59 |
| Pg WRKY113 | -DGCQWRKYGQKMAKGNPC | PRAYYRCTMA | -AVG       | PVRKQVQRC | SEDRT     | ILITTYEGTHNHP      | 59 |
| Pg WRKY115 | -DGCQWRKYGQKMAKGNPC | PRAYYRCTMA | -AVG       | PVRKQVQRC | AEDRT     | ILITTYEGTHNHP      | 59 |
| Pg WRKY118 | NDGCQWRKYGQKIAKGNPC | PRAYYRCTVA | -PGC       | PVRKQVQRC | LEDMS     | SILITTYEGTHNHP     | 59 |
| Pg WRKY120 | -DGCQWRKYGQKMAKGNPC | PRAYYRCTMA | -VGC       | PVRKQVQRC | AEDRT     | ILITTYEGTHNHP      | 58 |
| Pn WRKY17  | NDGCQWRKYGQKI       | SKGNPC     | PRAYYRCTVS | -PSC      | PVRKHVQRC | AEDMSILITTYEGAHNH  | 58 |
| Pn WRKY20  | NDGCQWRKYGQKIAKGNPC | PRAYYRCSVA | -PSC       | PVRKQVQRC | SDDMS     | SILITTYEGTHNHP     | 59 |
| Pn WRKY30  | NDGCQWRKYGQKIAKGNPC | PRAYYRCTVA | -PAC       | PVRKQVQRC | AEDMS     | SILITTYEGTHNHP     | 59 |
| Pn WRKY31  | -DGCQWRKYGQKMAKGNPC | PRAYYRCTMA | -VGC       | PVRKQVQRC | AEDRT     | ILITTYEGTHNHP      | 58 |
| Pn WRKY39  | -DGCQWRKYGQKMAKGNPC | PRAYYRCTMA | -AGC       | PVRKQVQRC | AEDRT     | ILITTYEGTHNHP      | 58 |
| Pn WRKY42  | -DGCQWRKYGQKIAKGNPC | PRAYYRCTMA | -AGC       | PVRKQVQRC | AEDRT     | ILITTYEGTHNHP      | 58 |
| Pn WRKY47  | NDGCQWRKYGQKIAKGNPC | PRAYYRCTVA | -PTC       | PVRKQVQRC | SDDMS     | SILISTYEGTHNHP     | 59 |

[illegible]

|            |   |                 | *        | 20          | *           | 40   | * |    |  |
|------------|---|-----------------|----------|-------------|-------------|------|---|----|--|
| Cc WRKY5   | E | YSWRKKYQKPKIGSP | FRGYVKCS | RGCCARKVERC | STMLIVTVE   | ENHN | P | 58 |  |
| Cc WRKY15  | E | YSWRKKYQKPKIGSP | FRGYVKCS | RGCCARKVERC | PAMLIVTVE   | ENHN | P | 57 |  |
| Cc WRKY17  | E | YSWRKKYQKPKIGSP | FRGYVKCS | RGCCARKVERA | DTMLIVTVE   | ENHN | P | 57 |  |
| Cc WRKY22  | E | YSWRKKYQKPKIGSP | FRGYVKCS | RGCCARKVERA | DTMLIVTVE   | ENHN | P | 57 |  |
| Cc WRKY33  | E | YSWRKKYQKPKIGSP | FRGYVKCS | RGCCARKVERA | DTMLIVTVE   | ENHN | P | 57 |  |
| Ha WRKY1   | E | YSWRKKYQKPKIGSP | FRGYVKCS | RGCCARKVERC | PAMLIVTVE   | ENHN | P | 58 |  |
| Ha WRKY15  | E | YSWRKKYQKPKIGSP | FRGYVKCS | RGCCARKVERA | DTMLIVTVE   | ENHN | P | 57 |  |
| Ha WRKY17  | E | YSWRKKYQKPKIGSP | FRGYVKCS | RGCCARKVERC | STMLIVTVE   | ENHN | P | 58 |  |
| Ha WRKY55  | E | YSWRKKYQKPKIGSP | FRGYVKCS | RGCCARKVERA | MDGMLIVTVE  | ENHN | P | 57 |  |
| Ha WRKY57  | E | YSWRKKYQKPKIGSP | FRGYVKCS | RGCCARKVERC | STMLIVTVE   | ENHN | P | 57 |  |
| Ha WRKY63  | E | YSWRKKYQKPKIGSP | FRGYVKCS | RGCCARKVERA | DTMLIVTVE   | ENHN | P | 57 |  |
| Ha WRKY65  | E | YSWRKKYQKPKIGSP | FRGYVKCS | RGCCARKVERA | DTMLIVTVE   | ENHN | P | 57 |  |
| Ha WRKY93  | E | YSWRKKYQKPKIGSP | FRGYVKCS | RGCCARKVERC | STMLIVTVE   | ENHN | P | 57 |  |
| Ha WRKY100 | E | YSWRKKYQKPKIGSP | FRGYVKCS | RGCCARKVERA | DTMLIVTVE   | ENHN | P | 57 |  |
| Ha WRKY102 | E | YSWRKKYQKPKIGSP | FRGYVKCS | RGCCARKVERA | DTMLIVTVE   | ENHN | P | 57 |  |
| Ls WRKY1   | E | YSWRKKYQKPKIGSP | FRGYVKCS | RGCCARKVERA | DTMLIVTVE   | ENHN | P | 57 |  |
| Ls WRKY23  | E | YSWRKKYQKPKIGSP | FRGYVKCS | RGCCARKVERA | ASMLIVTVE   | ENHN | P | 57 |  |
| Ls WRKY25  | E | YSWRKKYQKPKIGSP | FRGYVKCS | RGCCARKVERA | DTMLIVTVE   | ENHN | P | 57 |  |
| Ls WRKY56  | E | YSWRKKYQKPKIGSP | FRGYVKCS | RGCCARKVERC | STMLIVTVE   | ENHN | P | 58 |  |
| Ls WRKY61  | E | YSWRKKYQKPKIGSP | FRGYVKCS | RGCCARKVERC | STMLIVTVE   | ENHN | P | 57 |  |
| Dc WRKY25  | E | YSWRKKYQKPKIGSP | FRGYVKCS | RGCCARKVERA | DTMLIVTVE   | ENHN | P | 57 |  |
| Dc WRKY27  | E | YSWRKKYQKPKIGSP | FRGYVKCS | RGCCARKVERC | PEPSMLIVTVE | ENHN | P | 58 |  |
| Dc WRKY33  | E | YSWRKKYQKPKIGSP | FRGYVKCS | RGCCARKVERA | DTMLIVTVE   | ENHN | P | 57 |  |
| Dc WRKY42  | E | YSWRKKYQKPKIGSP | FRGYVKCS | RGCCARKVERA | PAMLIVTVE   | ENHN | P | 57 |  |
| Dc WRKY43  | E | YSWRKKYQKPKIGSP | FRGYVKCS | RGCCARKVERA | PAMLIVTVE   | ENHN | P | 57 |  |
| Pg WRKY10  | E | YSWRKKYQKPKIGSP | FRGYVKCS | RGCCARKVERC | PSMLIVTVE   | ENHN | P | 58 |  |
| Pg WRKY41  | E | YSWRKKYQKPKIGSP | FRGYVKCS | RGCCARKVERA | PSMLIVTVE   | ENHN | P | 57 |  |
| Pg WRKY55  | E | YSWRKKYQKPKIGSP | FRGYVKCS | RGCCARKVERA | PSMLIVTVE   | ENHN | P | 57 |  |
| Pg WRKY61  | E | YSWRKKYQKPKIGSP | FRGYVKCS | RGCCARKVERA | PAMLIVTVE   | ENHN | P | 57 |  |
| Pg WRKY66  | E | YSWRKKYQKPKIGSP | FRGYVKCS | RGCCARKVERA | PSMLIVTVE   | ENHN | P | 57 |  |
| Pg WRKY77  | E | YSWRKKYQKPKIGSP | FRGYVKCS | RGCCARKVERC | PSMLIVTVE   | ENHN | P | 58 |  |
| Pg WRKY85  | E | YSWRKKYQKPKIGSP | FRGYVKCS | RGCCARKVERC | PSMLIVTVE   | ENHN | P | 58 |  |
| Pg WRKY99  | E | YSWRKKYQKPKIGSP | FRGYVKCS | RGCCARKVERA | PAMLIVTVE   | ENHN | P | 57 |  |
| Pg WRKY117 | E | YSWRKKYQKPKIGSP | FRGYVKCS | RGCCARKVERA | PAMLIVTVE   | ENHN | P | 57 |  |
| Pn WRKY7   | E | YSWRKKYQKPKIGSP | FRGYVKCS | RGCCARKVERA | PAMLIVTVE   | ENHN | P | 57 |  |
| Pn WRKY19  | E | YSWRKKYQKPKIGSP | FRGYVKCS | RGCCARKVERC | PSMLIVTVE   | ENHN | P | 58 |  |
| Pn WRKY32  | E | YSWRKKYQKPKIGSP | FRGYVKCS | RGCCARKVERA | PSMLIVTVE   | ENHN | P | 57 |  |
| Pn WRKY41  | E | YSWRKKYQKPKIGSP | FRGYVKCS | RGCCARKVERA | PAMLIVTVE   | ENHN | P | 57 |  |
| Pn WRKY48  | E | YSWRKKYQKPKIGSP | FRGYVKCS | RGCCARKVERC | PSMLIVTVE   | ENHN | P | 58 |  |

## Group III

|            | *      | 20                      | *                | 40                 | *              | 60 |  |
|------------|--------|-------------------------|------------------|--------------------|----------------|----|--|
| Cc WRKY1   | -DDYEW | RKYGQKEILNSQFPRCYFRCTH  | KDGHGCKALKQVQ    | LEEELSSKFQIT       | YFGLHTCP       | 61 |  |
| Cc WRKY2   | EDGYT  | WRKYGQKEILGSKFPRGYFRCTH | QKLYNCFPAKKQVQ   | RLDNDP-YTF         | EVYRGEHTC-     | 60 |  |
| Cc WRKY14  | EDGFA  | WRKYGQKEILNAKAPRCYFRCTH | KNE-GCKALKQVQ    | KLED-GSQMF         | HTITFYFGYHTCQ  | 60 |  |
| Cc WRKY28  | DDGHA  | WRKYGQKEIL-----         | ECTYKLDQGLATKQVQ | KIDNEP-PLY         | KITYMRSHTC-    | 51 |  |
| Cc WRKY29  | DDGYA  | WRKYGQKEILHHTNHQSYRCTY  | KFDQGC           | EATKQVQKTDDEP-SKY  | KITYNGYHTC-    | 60 |  |
| Cc WRKY36  | DDGYN  | WRKYGQKEILGSKYPRSYRCTY  | RKAKNCLATKQVQ    | RTDEVP-AVF         | EITAYKGKHTCN   | 61 |  |
| Cc WRKY45  | DDGYS  | WRKYGQKEILGAKHPRGYRCTY  | RHSEGLATKQVQ     | RTEDDP-NIENI       | SYRGSHTCN      | 61 |  |
| Cc WRKY52  | DDGYS  | WRKYGQKEILGAKFPRSYRCTY  | RYVHNCMARKQVQ    | RTDEDP-TVFE        | ITYRGKHAC-     | 60 |  |
| Cc WRKY56  | -DGY   | WRKYGQKEILGANHP----     | RCTHRNFQGLATKQVQ | RSDEDS-SVFE        | ITYKGRHTC-     | 55 |  |
| Ha WRKY12  | DDGYG  | WRKYGQKEILGAKFPRSYRCTY  | RHAQNCMARKQVQ    | RTDEDP-TVFD        | ISYKQHTC-      | 60 |  |
| Ha WRKY13  | DDGYS  | WRKYGQKEILGSKFPRSYRCTY  | RIIHC            | MARKQVQRTNEDP-TVFE | ITYKQHTC-      | 60 |  |
| Ha WRKY30  | NDGYS  | WRKYGQKEILGASHPRAYRCTH  | RNVQGLATKQVQ     | RSDEDS-SVFE        | ISYRGRHTC-     | 60 |  |
| Ha WRKY33  | NDGYS  | WRKYGQKEILNAKYHREYRCTY  | RNTHGCCATKQVQ    | RSSEDP-STFD        | ITYLGKHTCP     | 61 |  |
| Ha WRKY36  | DDGYN  | WRKYGQKEILGAKFPRSYRCSY  | RNSQKCFATKQVQ    | RKDEDP-AGFD        | IVYKGKHTC-     | 60 |  |
| Ha WRKY37  | DDGYN  | WRKYGQKEILGAKFPRSYRCSY  | RNSQKCFATKQVQ    | RKDEDP-TEFE        | EITAYKGKHTC-   | 60 |  |
| Ha WRKY38  | -DGYN  | WRKYGQKEILGARFPRSYRCSY  | RNAQKCFATKYVQ    | RTDKDP-AEFE        | ITYKGKHTC-     | 59 |  |
| Ha WRKY43  | EDGYT  | WRKYGQKEILGSRFPRGYRCTH  | QKLYNCFPAKKQVQ   | RLDNDP-FTFE        | EVYRGDHTC-     | 60 |  |
| Ha WRKY44  | EDGYA  | WRKYGQKEILNSKFPRCYFRCTH | KDGHGCKALKQVQ    | LEEESNMFI          | TYFGKHTCP      | 62 |  |
| Ha WRKY50  | EDGYV  | WRKYGQKEILHAKFPRCYRCTH  | KDE-GCKALRQVQ    | LEEYGS             | SEKRYTYIGSHTC- | 60 |  |
| Ha WRKY51  | EDGFA  | WRKYGQKEILDAKFPRCYRCTH  | KSE-GCKALKQVQ    | KLED-GSERF         | HTITYFGSHTC-   | 59 |  |
| Ha WRKY52  | EDGFA  | WRKYGQKEILDAKFPRCYRCTH  | KNE-GCKALKQVQ    | KLED-GSERF         | HTITYGSHTC-    | 59 |  |
| Ha WRKY59  | DDGYA  | WRKYGQKEILNSKHQRYRCSH   | KFEQGCATKQVQ     | KTDDEP-SKY         | KITYIGVHTC-    | 60 |  |
| Ha WRKY60  | DDGYA  | WRKYGQKEILNSKYQRYRCSY   | KFEQGCATKQVQ     | MIDDEL-PKY         | KITYCGHHTC-    | 60 |  |
| Ha WRKY61  | DDGYA  | WRKYGQKEILNSKHQRYRCSH   | KFEQGCATKQVQ     | KTDSKP-SNY         | KITYNGLHTC-    | 60 |  |
| Ha WRKY64  | DDGYA  | WRKYGQKEILNSKHQRYRCSH   | KFEQGCATKQVQ     | KINDKP-SKY         | KITYNGRHTC-    | 60 |  |
| Ha WRKY76  | NDGHN  | WRKYGQKEILNAKYPREYRCTY  | RNTHGCCATKQVQ    | RSQDP-STFD         | ITYLGKHTCP     | 61 |  |
| Ha WRKY78  | DDGYS  | WRKYGQKEILGAKFPRSYRCTY  | RIHQCMARKQVQ     | RTDEDP-MVFE        | ITYRGQHTC-     | 60 |  |
| Ha WRKY86  | EDGFA  | WRKYGQKEILNSKSPRCYFRCTH | KHVHGC           | KAQKQVQKLEDG-SNM   | HTITYLGKHTCP   | 61 |  |
| Ha WRKY87  | EDGYA  | WRKYGQKEILNSDFPRCYFRCTH | KQVYGCKALKQVQ    | KLDG-SNMF          | QITYFGHHTCP    | 61 |  |
| Ha WRKY88  | EDGYA  | WRKYGQKEILNSNFPRCYFRCTH | KQVHGC           | KAQKQVQKLEDG-SNM   | HTITYFGHHTCP   | 61 |  |
| Ha WRKY89  | EDGYS  | WRKYGQKEILGSKFPRGYRCTH  | QKLYNCFPAKKQVQ   | RLDNDP-YTF         | EVYRGDHTC-     | 60 |  |
| Ha WRKY90  | DDGYA  | WRKYGQKEILNSKYQRYRCSH   | KFEQGCATKQVQ     | KTDDEP-PMY         | RTYHRHTC-      | 60 |  |
| Ha WRKY92  | EDGFA  | WRKYGQKEILDAKFPRCYRCTH  | KNE-GCKALKQVQ    | KLED-GSERF         | HTITYGSHTC-    | 59 |  |
| Ls WRKY5   | EDGYT  | WRKYGQKEILGSRFPRGYRCTH  | QKLYNCFPAKKQVQ   | RLDNDP-NTFE        | EVYRGDHTC-     | 60 |  |
| Ls WRKY6   | EDGYS  | WRKYGQKEILNSKFPRCYFRCTH | KHVLGCKALKQVQ    | KLEDE-TNML         | HTITYFGYHTC-   | 60 |  |
| Ls WRKY7   | EDGYA  | WRKYGQKEILNSQSPRCYFRCTH | KPDHGC           | KAQKQVQKLEDE-SNM   | HTITYFGHHTC-   | 60 |  |
| Ls WRKY15  | -DGY   | WRKYGQKEILGANHPRAYRCTH  | RHVQGLATKQVQ     | RSDEDS-SVFE        | ITYRGRHTC-     | 59 |  |
| Ls WRKY34  | NDGYS  | WRKYGQKEILGAKFPRSYRCSY  | RKVQKCLATKQVQ    | KTDDEP-TVFE        | ITYRGRHTC-     | 60 |  |
| Ls WRKY35  | DDGYS  | WRKYGQKEILGAKFPRSYRCTY  | RYVHNCMARKQVQ    | RTDEDP-TVFE        | ITYRGKHSC-     | 60 |  |
| Ls WRKY45  | -----  | WRKYGQKEILNAKYPREYRCTY  | RNTHGCCATKQVQ    | RSDDDS-SIFE        | ITYLGKHTC-     | 55 |  |
| Ls WRKY50  | DDGYN  | WRKYGQKEILGAKHPRGYRCTY  | RQLQGLATKQVQ     | RTNEDP-NIENI       | MTYQGIHTC-     | 60 |  |
| Ls WRKY65  | -DGH   | WRKYGQKEILNANHQRSYRCTY  | KSDQGLATKQVQ     | MIEDKP-PKY         | RTITYFGNHTC-   | 59 |  |
| Ls WRKY66  | -DGHV  | WRKYGQKEILNAKHKNRYRCTH  | KFDQGCATKQVQ     | TEHEP-TKY          | KITYNRHHIC-    | 59 |  |
| Ls WRKY67  | DDGHA  | WRKYGQKEILNAKHQRNYRCTH  | KTDQGCATKQVQ     | MTDEDP-PQY         | KITYSGHHTC-    | 60 |  |
| Ls WRKY68  | -DGH   | WRKYGQKEILNNTNHQRSYRCTY | KFDQGLAAKQVQ     | KIQDKP-PKY         | KITYMRNHTC-    | 59 |  |
| Ls WRKY71  | EDGYA  | WRKYGQKEILNAKFPRCYFRCTH | KTE-GCKALRQVQ    | KLED-GSQMF         | HTITYGNHTC-    | 59 |  |
| Dc WRKY6   | -DGY   | WRKYGQKEILGAAHPRSYRCTY  | RKTRSCATKQVQ     | RSDDDS-AIFE        | ITYKGKHTC-     | 59 |  |
| Dc WRKY9   | DDGYS  | WRKYGQKEILGATFPAYRCTH   | RTHQGLATKQVQ     | QSDSDQ-SVFE        | HTICKGRHTC-    | 60 |  |
| Dc WRKY21  | -DGH   | WRKYGQKEILGATFPAYRCTY   | RHSQGLATKQVQ     | KSDDDS-SLVQ        | VTYKGSHTC-     | 59 |  |
| Dc WRKY23  | DDGYN  | WRKYGQKEILGAKYPRGYRCTH  | RHAQGLATKQVQ     | RSDDNDP-TLFE       | ITYRGRHTC-     | 60 |  |
| Dc WRKY38  | EDGYS  | WRKYGQKEILNSKYPRCYFRCTY | KHEQGCALQVQ      | QLEDD-KRM          | YNITYFGQHTC-   | 60 |  |
| Dc WRKY50  | EDGFT  | WRKYGQKEILGSRFPAYRCTH   | QKLYNCFPAKKQVQ   | RLADDP-FTFE        | EVYRGDHTC-     | 60 |  |
| Dc WRKY53  | -DGH   | WRKYGQKEILNAKYPRHYRCTH  | KFEQGCATKQVQ     | TEEDPAPMY          | RTITYRGRHTC-   | 60 |  |
| Dc WRKY61  | EDGYS  | WRKYGQKEILGATHPRSYRCTY  | RNTQMCYATKQVQ    | RSDDNDP-TIFE       | ITYKGKHTC-     | 60 |  |
| Pg WRKY12  | -DGY   | WRKYGQKEILGARFPAYRCTH   | RHAQGLATKQVQ     | KSDSDP-SILG        | ITYRGRHTC-     | 59 |  |
| Pg WRKY16  | DDGYS  | WRKYGQKEILGAKYPRSYRCTY  | RNTQTCWATKQVQ    | RSDEDP-ALFE        | ITYKGRHTC-     | 60 |  |
| Pg WRKY25  | DDGYS  | WRKYGQKEILGAKYPRSYRCTY  | RNTQTCWATKQVQ    | RSDEDP-ALFE        | ITYKGRHTC-     | 60 |  |
| Pg WRKY34  | DDGYS  | WRKYGQKEILGATYPRSYRCTY  | RNTQTCATKQVQ     | RSDDDP-TVFE        | ITYRGKHTC-     | 60 |  |
| Pg WRKY43  | DDGYS  | WRKYGQKEILGAKYPRGYRCTN  | RHIQGLATKQVQ     | RSDDSDP-TIFE       | ITYRGRHTC-     | 60 |  |
| Pg WRKY46  | EDGYT  | WRKYGQKEILGSRFPRSYRCTH  | QKLYQCFPAKKQVQ   | RLDHDP-FTFE        | VYRGHHKC-      | 60 |  |
| Pg WRKY47  | DDGYA  | WRKYGQKEILNSKYPRCYFRCTH | KDQGCALQVQ       | QFEND-TKM          | ENITYFGRHTC-   | 60 |  |
| Pg WRKY72  | -DGY   | WRKYGQKEILGARFPAYRCTY   | RHAQGLATKQVQ     | KSDSDP-SILG        | ITYRGRHTC-     | 59 |  |
| Pg WRKY84  | -EGY   | WRKYGQKEILGASFPRAYRCTH  | RHAQGLATKQVQ     | KSEENP-SLLE        | VYRGRHTC-      | 59 |  |
| Pg WRKY92  | DDGYA  | WRKYGQKEILNSKYPRCYFRCTH | KDQGCALQVQ       | QLEND-TKM          | ENITYFGRHTC-   | 60 |  |
| Pg WRKY100 | EDGHA  | WRKYGQKEILNAKYPRNYRCTH  | KFDQGCATKQVQ     | RTGEDP-PIY         | RTYVHDHHTC-    | 60 |  |
| Pg WRKY104 | -DGY   | WRKYGQKEILGASFPRAYRCTH  | RHAQGLATKQVQ     | KSEENP-SLLE        | VYRGRHTC-      | 59 |  |
| Pg WRKY114 | DDGYS  | WRKYGQKEILGATYPRSYRCTY  | RNTQTCATKQVQ     | RSDDDP-TVFE        | ITYRGKHTC-     | 60 |  |
| Pg WRKY119 | EDGYA  | WRKYGQKEILNAKYPRNYRCTH  | KFDQGCATKQVQ     | RTGEEDP-PMY        | RTYVGHHTC-     | 60 |  |
| Pn WRKY4   | DDGYS  | WRKYGQKEILGAKYPRGYRCTN  | RHIQGLATKQVQ     | RSDDNDP-TIFE       | ITYRGRHTC-     | 60 |  |
| Pn WRKY5   | DDGYA  | WRKYGQKEILNSKYPRCYFRCTH | KDQGCALQVQ       | QFEND-TKM          | ENITYFGRHTC-   | 60 |  |
| Pn WRKY10  | -DGY   | WRKYGQKEILGASFPRAYRCTH  | RHAQGLATKQVQ     | KSEENP-SLLE        | ITYRGRHTC-     | 59 |  |
| Pn WRKY12  | -DGY   | WRKYGQKEILGARFPAYRCTH   | RHAQGLATKQVQ     | KSDSDP-SILG        | ITYRGRHTC-     | 59 |  |
| Pn WRKY29  | DDGYS  | WRKYGQKEILGATYPRSYRCTY  | RNTQTCATKQVQ     | RSDDDP-TVFE        | ITYRGKHTC-     | 60 |  |
| Pn WRKY56  | DDGYS  | WRKYGQKEILGAKYPRSYRCTY  | RNTQTCWATKQVQ    | RSDEDP-AVFE        | ITYKGRHTC-     | 60 |  |

## Group UN

|            | *     | 20                      | *                  | 40               | *    |    |
|------------|-------|-------------------------|--------------------|------------------|------|----|
| Cc WRKY8   | EDGYN | WRKYGQKQVKGSENPRSYKCTY  | PNCPTKKKVERNLEGH   | TEIVYKGN         | SH-  | 56 |
| Ls WRKY2   | DDGYR | WRKYGQKQVKGNNNRSYYKCVSS | NCKVKKTIETNFDGQITK | AYTGSHNHP--      |      | 54 |
| Dc WRKY52  | EDGYN | WRKYGQKQVKGSEYPRSYKCTY  | QNCQVKKVVERSLDQTE  | IIYKGA           | NHP  | 57 |
| Pg WRKY42  | DGYR  | WRKYGQKQVKGMPHPRNYRCT   | SAGCPVRKH          | ETANDSRSSVITYKGI | EDH- | 56 |
| Pg WRKY122 | EDGYN | WRKYGQKQVKGSEYPRSYKCTY  | PNCPTKKKVEGSQEGH   | TEIIYKGA         | TH-  | 56 |
