# Supplementary material for: Genome-Wide Identification of WRKY Transcription Factors in the Asteranae
Source: MDPI journal article supplement (doi:10.3390/plants8100393), 2019-10-01

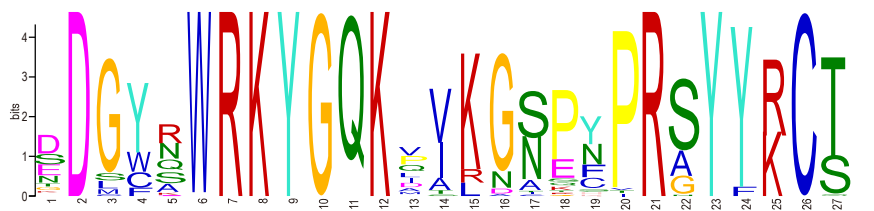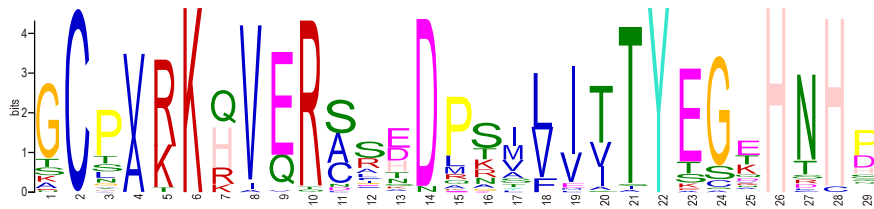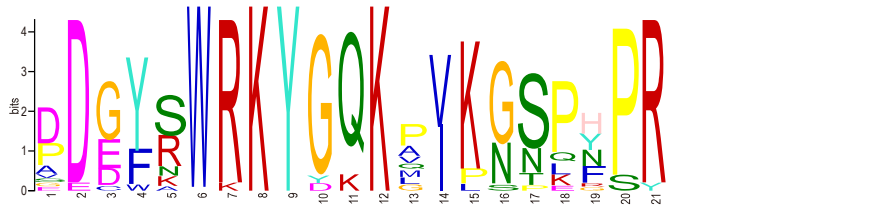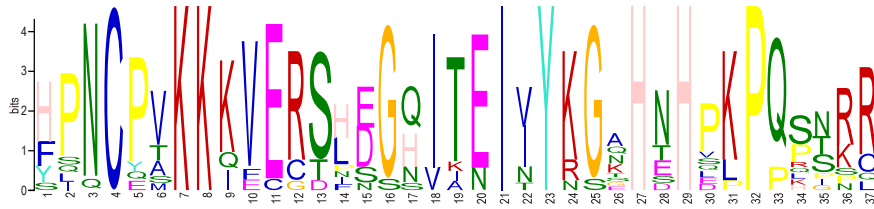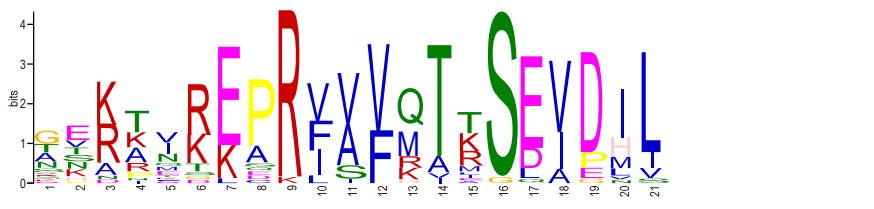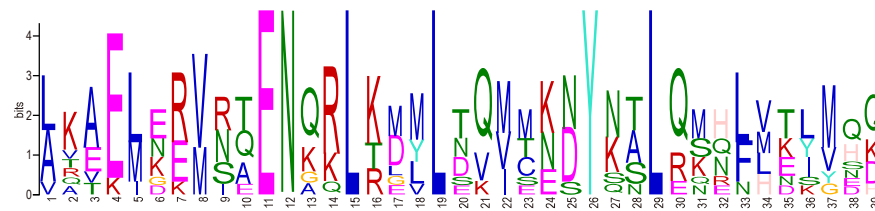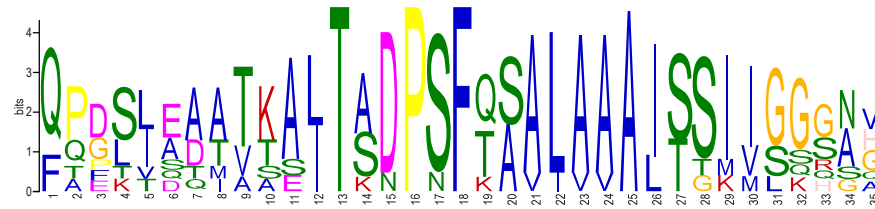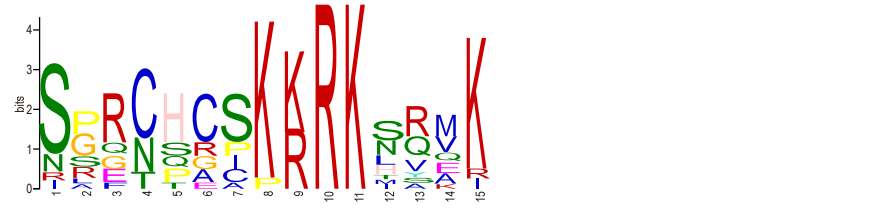

Sequence logo for the 29 amino acids. The y-axis is labeled 'bits' and ranges from 0 to 4. The x-axis shows amino acids 1 to 29. The logo shows high conservation for positions 1-10 and 19-20, and lower conservation for positions 11-18 and 21-29.

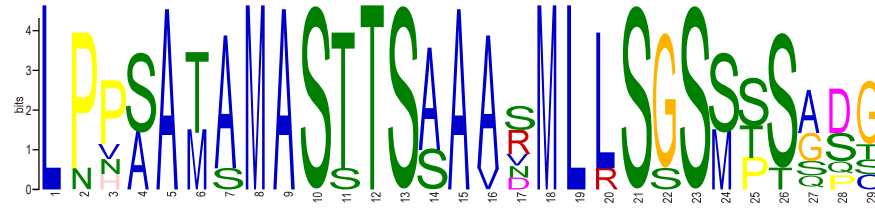

Sequence logo showing the relative frequency of amino acids (1-29) across positions. The y-axis represents information content in bits (0 to 4). The x-axis lists amino acids 1 through 29. The logo shows the relative frequency of each amino acid at each position, with colors corresponding to the legend.

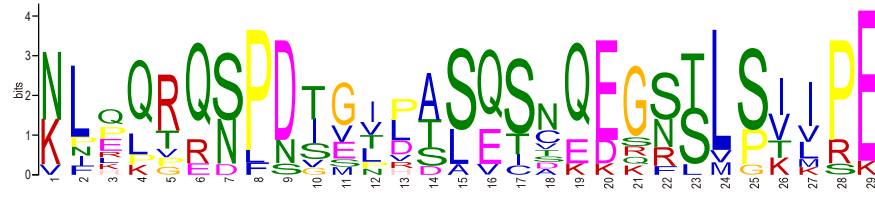

Supplement: s1 [file s1]
